# Supplementary material
Source: publisher figshare collection journal article supplement (https://acs.figshare.com/ndownloader/files/18154991)
Supplement: Supplementary file 1 [file 18154991]

## Supporting Information

### **Interface engineering of RGO/MoS<sub>2</sub>/Pd 2D heterostructure for electrocatalytic overall water splitting in alkaline medium**

Ayushi Pandey<sup>1†</sup>, Ayan Mukherjee<sup>1†</sup>, Sankalpita Chakrabarty<sup>1†</sup>, Debabrata Chanda<sup>1</sup> and Suddhasatwa Basu<sup>1,2\*</sup>

<sup>1</sup>Department of Chemical Engineering, Indian Institute of Technology Delhi, New Delhi 110016, India

<sup>2</sup> CSIR-Institute of Minerals and Materials Technology Bhubaneswar India

† These authors contributed equally

\*Corresponding author, Email: sbasu@iitd.ac.in

## **1 Experimental section**

### **1.1 Material Synthesis:**

#### **1.1.1 Material:**

All the precursors were obtained from Sigma Aldrich and used without further purification.

#### **1.1.2 Synthesis:**

For the synthesis of MoS<sub>2</sub>, 0.23 gm of (NH<sub>4</sub>)<sub>6</sub>Mo<sub>7</sub>O<sub>24</sub>·4H<sub>2</sub>O (ammonium molybdate tetrahydrate) and 0.3 gm of CH<sub>3</sub>CSNH<sub>2</sub> (thioacetamide) were dispersed in 30 ml of de-ionized (DI) water and kept at stirring for 2h to form exfoliated dispersion followed by addition of 1M NaOH to the solution. In order to maintain the neutral pH of the solution, 1 ml of glacial acetic acid was further added and stirred for another 30 min. The prepared transparent solution was transferred to teflon lined autoclave and kept at 180°C, for 24 h. The final product was collected by centrifugation and washed with DI water and dried overnight to obtain the powder sample. The obtained powder sample was calcined at 100°C for 1 h under N<sub>2</sub> atmosphere to obtain the desired MoS<sub>2</sub>.

For the synthesis of RGO-MoS<sub>2</sub> (RMoS<sub>2</sub>), graphene oxide was prepared by modified hummer's method. 30 mg of as prepared graphene oxide was taken in 30 ml of water and sonicated for 12 h to allow the homogeneous exfoliation of graphene oxide, which is subsequently added to 0.23 g of Ammonium molybdate tetrahydrate and 0.30 g of thioacetamide and followed by the above said steps to obtain the desired RMoS<sub>2</sub>.

MoS<sub>2</sub>Pd was prepared by dispersing 40 mg of as prepared MoS<sub>2</sub> powder in 20 ml of deionized water. The solution was stirred for 8 h and then 10 mg of PdCl<sub>2</sub> was added to it, which was stirred for 1 h followed by addition of 10 ml of 50 mM NaBH<sub>4</sub> solution and

stirred for another 30 min. The precipitate was collected by centrifugation, washed with DI water and dried at ambient temperature to obtain MoS<sub>2</sub>Pd powder.

To prepare RMoS<sub>2</sub>Pd, 40 mg of RMoS<sub>2</sub> powder (prepared as before) was added to 40 ml of deionized water and stirred vigorously for 8 h to obtain well dispersed solution. 10 mg of PdCl<sub>2</sub> was added to the solution and stirred for 1 h followed by addition of 10 ml of 50 mM NaBH<sub>4</sub> solution and further stirred for 30. The final solution was centrifuged, washed and dried at ambient temperature to obtain RMoS<sub>2</sub>Pd powder.

## **1.2 Characterization:**

The X-ray diffraction (XRD) study was carried by Rigaku Miniflex 600 X-ray diffractometer using Cu K $\alpha$  ( $\lambda=1.5418$  Å) radiation. Raman analysis is done on Invia Raman microscope under excitation by 514 nm argon ion laser pulse. X-ray photoelectron spectroscopy (XPS) measurement was conducted by Thermo VG scientific Theta Probe instrument with Al K $\alpha$  target, 1486.6eV energy and maximum power of 15 kW. The transmission electron microscopy (TEM) images were obtained from FEI-Technai-G20 instrument operating at an accelerating voltage of 200 kV. The elemental mapping was characterized by scanning electron microscope (JEOL SEM JSM 6010 LA). Prior to TEM analysis, the aqueous solution of a small amount of sample was dispersed homogeneously in an ultrasonic bath to ensure maximum dispersion of the 2D nanostructure. 2  $\mu$ l of the solution was cast on a 300 mesh Cu grid, coated with a lacy carbon film and dried at ambient temperature overnight. The Brunauer, Emmett and Teller (BET) analysis was done from N<sub>2</sub> adsorption/desorption isotherm using a Quantachrome Autosorb 1-C instrument. An inductively coupled plasma-mass spectrometry (ICPMS) (Agilent Technologies, 7500 CE, USA) was used to determine the contents of Mo and Pd in the prepared catalysts. The content of C and S was determined from a CHNS analyser (Elementar Vario Macro Cube).

### 1.3 Electrochemical measurements:

The linear sweep voltammetry (LSV), Chronoamperometry (CA) and electrochemical impedance spectroscopy (EIS) were recorded by using a potentiostat-galvanostat (Autolab, PGSTAT 30, GPES) in the conventional three-electrode assembly at ambient temperature. A glassy carbon (GC) electrode of 3 mm diameter, a platinum wire and Ag/AgCl saturated in KCl was used as the working electrode, counter electrode and reference electrode, respectively. In order to prepare the homogeneous catalyst slurry, 1 mg of electrocatalysts was dispersed in desired amount of Nafion (5 wt. %)/ethanol solution and ultrasonicated for 30 min, which was deposited on the tip of a GC electrode and dried at ambient conditions. The final catalyst loading was  $0.35 \text{ mg.cm}^{-2}$ . The electrolyte used throughout the electrochemical measurements was freshly prepared 1 M KOH solution for all the catalysts. The potentials were measured against Ag/AgCl (saturated KCl) and then converted to RHE. The EIS was recorded in the frequency range of 0.1 Hz to 1 MHz at an applied voltage of 100 mV. All the electrochemical data presented in the manuscript are  $iR$  corrected and the polarisation curves are measured at scan rate of  $10 \text{ mV.s}^{-1}$ .

## 2. Result and discussions

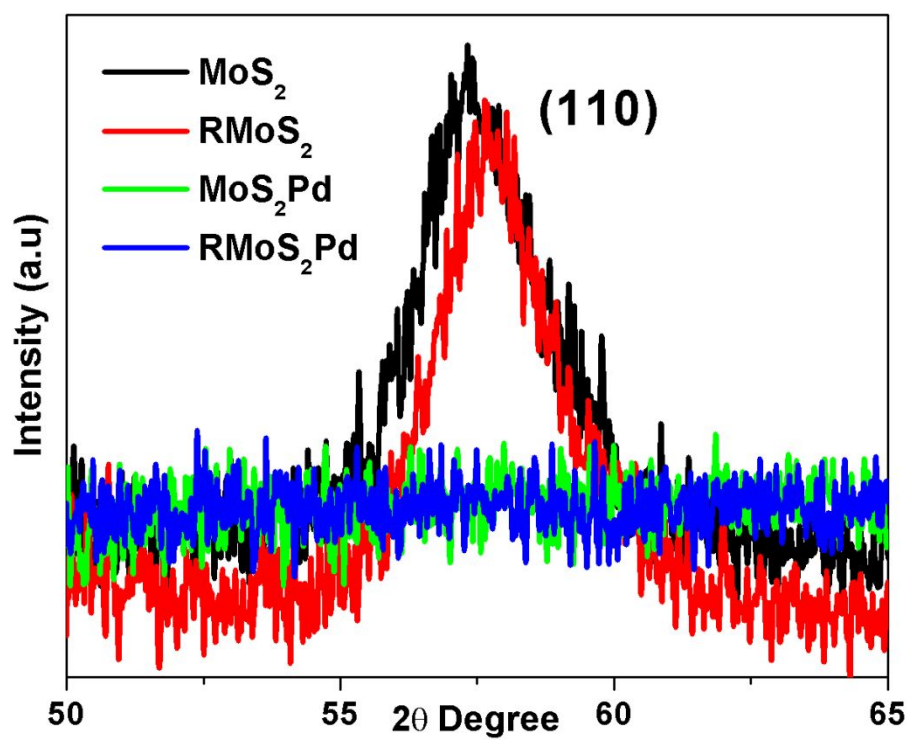

Fig. S1 XRD pattern of all the catalysts at  $2\theta = 50^\circ$  to  $65^\circ$

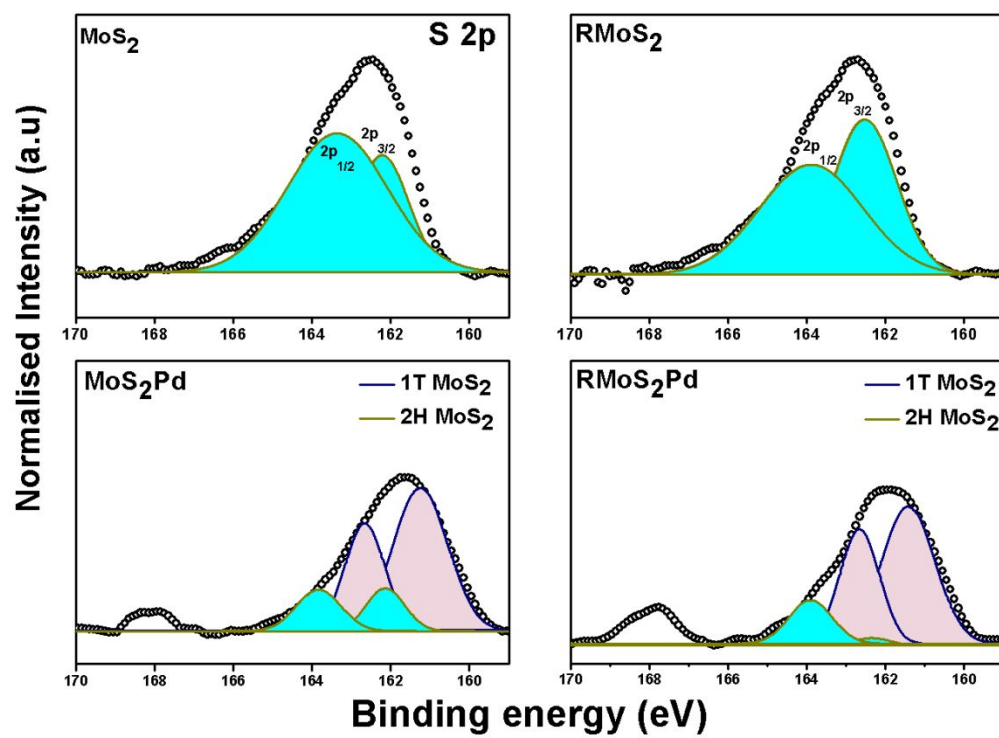

**Fig. S2 Normalised S2P spectra by Mo 3d intensity for MoS<sub>2</sub>, RMoS<sub>2</sub>, MoS<sub>2</sub>Pd and RMoS<sub>2</sub>Pd**

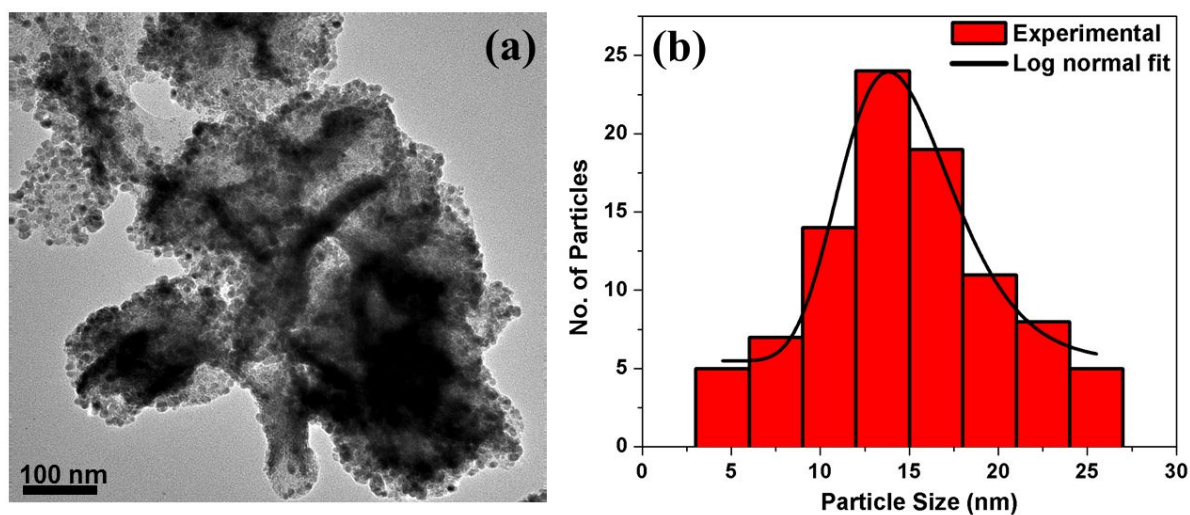

**Fig. S3 (a) Representative TEM image of RMoS<sub>2</sub>Pd, (b) corresponding log normal fitting taken from (a)**

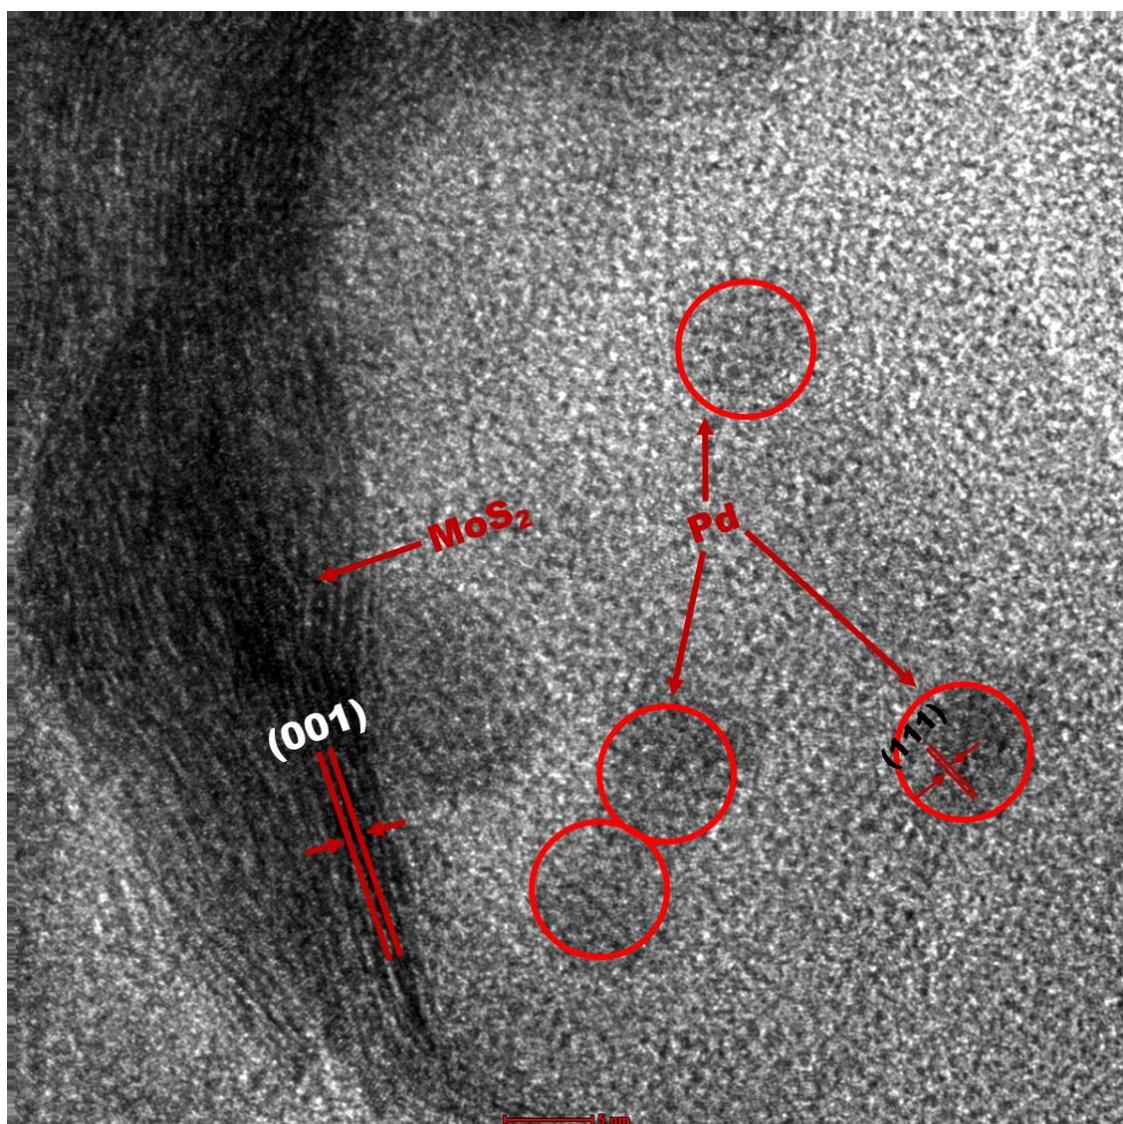

**Fig. S4 HRTEM image of RMoS<sub>2</sub>Pd**

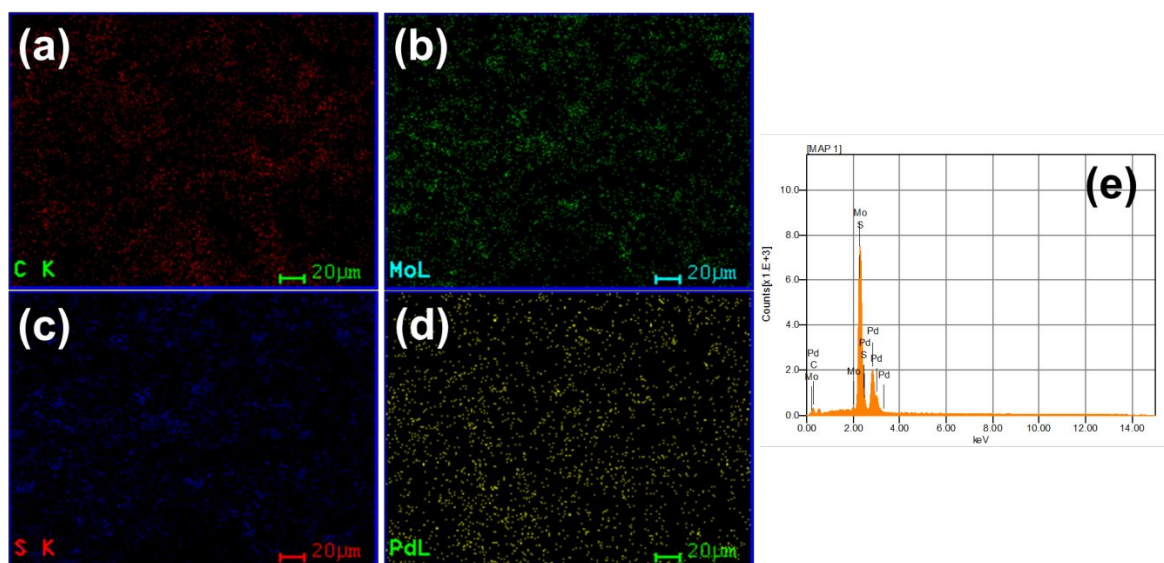

**Fig. S5. EDS-mapping of RMoS<sub>2</sub>Pd (a) carbon, (b) Mo, (c) S, (d) Pd and (e) EDS spectra**

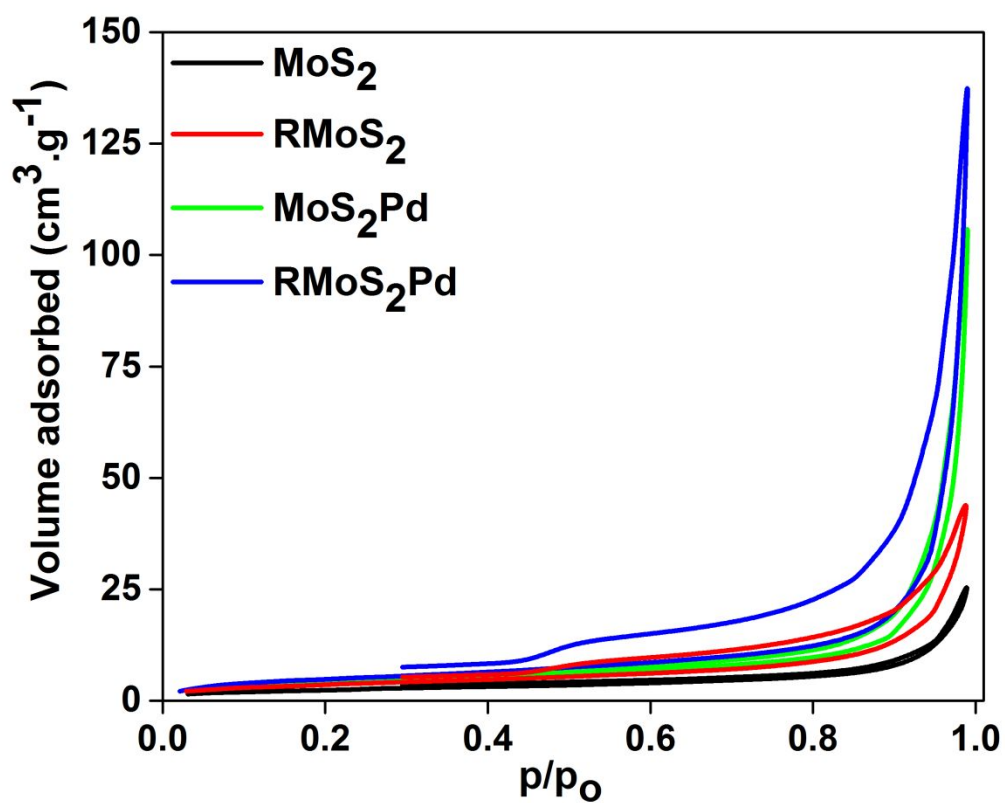

Fig. S6  $\text{N}_2$  adsorption/desorption spectra of all the catalysts

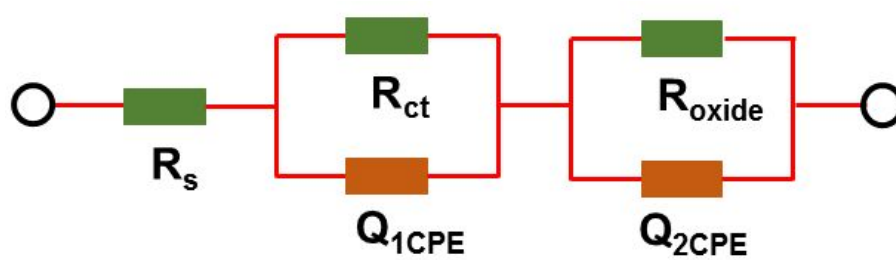

Fig. S7 Equivalent circuit model from Nyquist plot

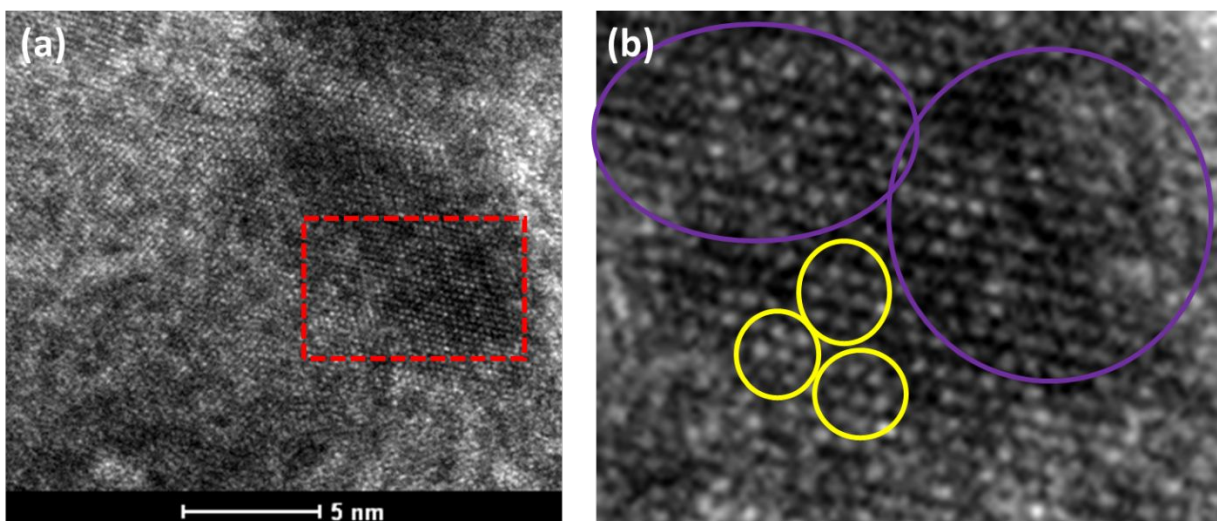

**Fig. S8 (a) Post mortem HRTEM image of RMoS<sub>2</sub>Pd after OER, (b) magnified view of the portion marked in red in (a)**

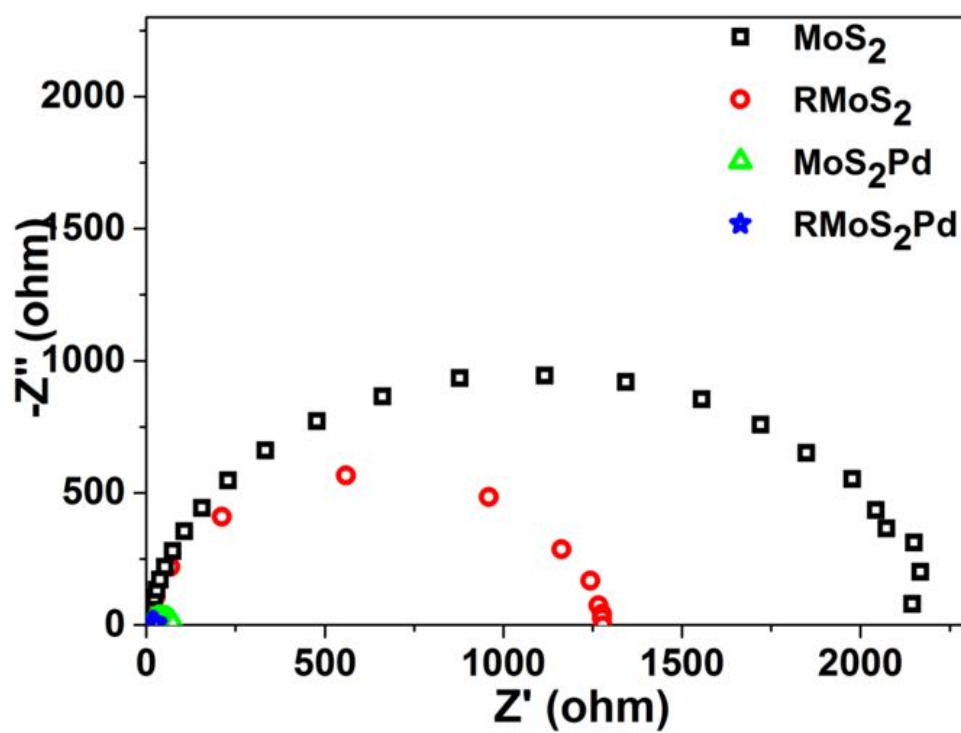

Fig. S9 Nyquist plot for all catalyst in HER

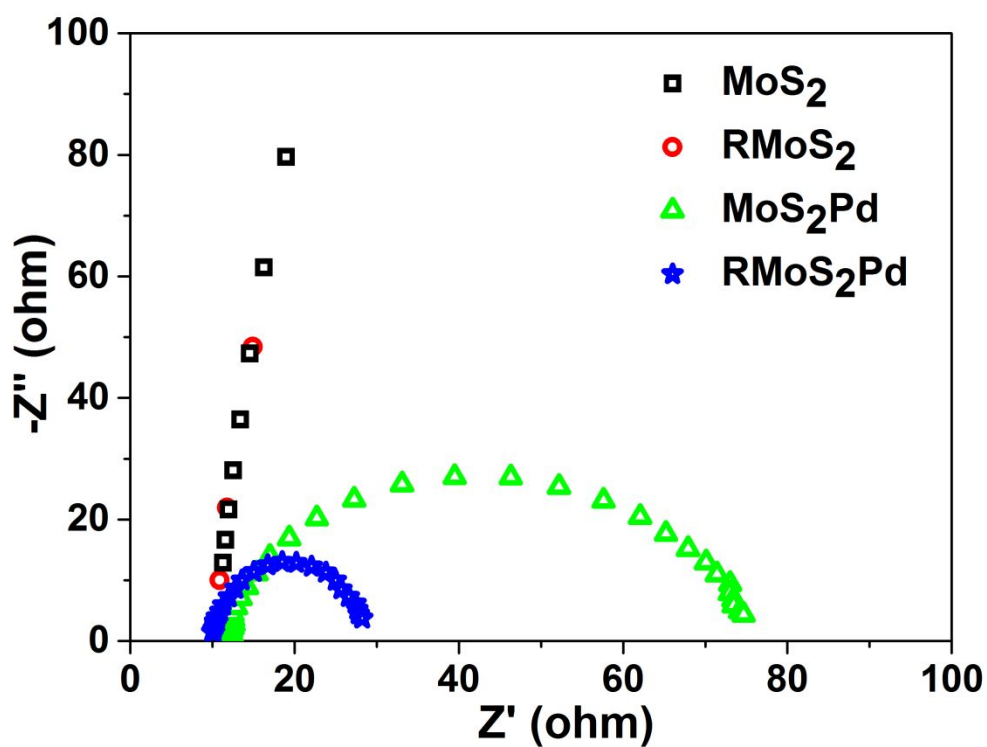

Fig. S10 Magnified view of Fig. S9

Table S1 Average of three measurement results of ICPMS and CHNS analysis for all catalysts

| Catalysts            | ICPMS ( $\mu\text{g}.\text{mg}^{-1}$ ) |      | %    |       |
|----------------------|----------------------------------------|------|------|-------|
|                      | Mo                                     | Pd   | C    | S     |
| MoS <sub>2</sub>     | 103.01                                 | 0.00 | 0.00 | 22.81 |
| RMoS <sub>2</sub>    | 99.74                                  | 0.00 | 6.95 | 22.43 |
| MoS <sub>2</sub> Pd  | 98.97                                  | 8.56 | 0.00 | 16.23 |
| RMoS <sub>2</sub> Pd | 97.46                                  | 7.87 | 7.23 | 15.40 |

**Table S2 Performance of various catalysts towards OER and HER**

| Catalyst                                                                                               | OER                                                     |                                           | HER                                                     |                                           | Electrolyte                                        | Reference     |
|--------------------------------------------------------------------------------------------------------|---------------------------------------------------------|-------------------------------------------|---------------------------------------------------------|-------------------------------------------|----------------------------------------------------|---------------|
|                                                                                                        | Overpotential<br>@10 mA.cm <sup>-2</sup><br>(mV vs RHE) | Tafel<br>slope<br>(mV.dec <sup>-1</sup> ) | Overpotential<br>@10 mA.cm <sup>-2</sup><br>(mV vs RHE) | Tafel<br>slope<br>(mV.dec <sup>-1</sup> ) |                                                    |               |
| RMoS <sub>2</sub> Pd                                                                                   | 245                                                     | 42                                        | 86                                                      | 35.9                                      | 1 M KOH                                            | This work     |
| MoS <sub>2</sub> Pd                                                                                    | 330                                                     | 68                                        | 114                                                     | 45.4                                      | 1 M KOH                                            | This work     |
| Co <sub>2</sub> P/Co foil                                                                              | 319                                                     | 79                                        | 157                                                     | 59                                        | 1 M KOH                                            | <sup>1</sup>  |
| Co <sub>4</sub> Mo <sub>2</sub> @NC                                                                    | 330                                                     | 48.7                                      | 218                                                     | 73.5                                      | 1 M KOH                                            | <sup>2</sup>  |
| Ni <sub>2</sub> P                                                                                      | 290                                                     | 59                                        | 220                                                     | ---                                       | 1 M KOH                                            | <sup>3</sup>  |
| Ni <sub>2</sub> P-RGO                                                                                  | 260                                                     | 62                                        | 142                                                     | 58                                        | 1 M KOH                                            | <sup>4</sup>  |
| lepidocrocite<br>VOOH                                                                                  | 270                                                     | 68                                        | 164                                                     | 104                                       | 1 M KOH                                            | <sup>5</sup>  |
| SrNb <sub>0.1</sub> Co <sub>0.7</sub> F<br>e <sub>0.2</sub> O <sub>3-δ</sub><br>perovskite<br>nanorods | 390                                                     | 61                                        | 262                                                     | 134                                       | 0.1 M KOH                                          | <sup>6</sup>  |
| MoS <sub>2</sub> -Ni <sub>3</sub> S <sub>2</sub>                                                       | 249                                                     | 57                                        | 98                                                      | 61                                        | 1 M KOH                                            | <sup>7</sup>  |
| Ni <sub>3</sub> FeN/r-GO                                                                               | 270                                                     | 54                                        | 94                                                      | 90                                        | 1 M KOH                                            | <sup>8</sup>  |
| Ni-Fe-P@C<br>NRs                                                                                       | 217                                                     | 40                                        | 79                                                      | 92.6                                      | 1 M KOH                                            | <sup>9</sup>  |
| (MOF-<br>derived)<br>CoS <sub>x</sub> @MoS <sub>2</sub>                                                | 347*                                                    | 147*                                      | 239**                                                   | 103**                                     | *1 M KOH<br>**0.5 M H <sub>2</sub> SO <sub>4</sub> | <sup>10</sup> |
| Co <sub>3</sub> S <sub>4</sub> @MoS <sub>2</sub>                                                       | 330*                                                    | 59*                                       | 210**                                                   | 88**                                      | *1 M KOH<br>**0.5 M H <sub>2</sub> SO <sub>4</sub> | <sup>11</sup> |
| Ni-Co-P<br>HNB                                                                                         | 270                                                     | 76                                        | 107                                                     | 46                                        | 1 M KOH                                            | <sup>12</sup> |
| MoS <sub>2</sub> /CF-750                                                                               | ---                                                     | ---                                       | 125                                                     | 34                                        | 0.5 M H <sub>2</sub> SO <sub>4</sub>               | <sup>13</sup> |
| MoS <sub>2</sub> @HG                                                                                   | ---                                                     | ----                                      | 124                                                     | 41                                        | 0.5 M H <sub>2</sub> SO <sub>4</sub>               | <sup>14</sup> |

|                                                    |     |    |     |      |                                         |               |
|----------------------------------------------------|-----|----|-----|------|-----------------------------------------|---------------|
| MnO <sub>2</sub> -<br>CoP <sub>3</sub> /Ti         | 288 | 65 | --- | ---  | 1 M KOH                                 | <sup>15</sup> |
| <del>CoS<sub>2</sub>@MoS<sub>2</sub>/</del><br>RGO | --  | -- | 98  | 37.4 | 0.5 M<br>H <sub>2</sub> SO <sub>4</sub> | <sup>16</sup> |

## References

- (1) Yuan, C. Z.; Zhong, S. L.; Jiang, Y. F.; Yang, Z. K.; Zhao, Z. W.; Zhao, S. J.; Jiang, N.; Xu, A. W. Direct Growth of Cobalt-Rich Cobalt Phosphide Catalysts on Cobalt Foil: An Efficient and Self-Supported Bifunctional Electrode for Overall Water Splitting in Alkaline Media. *J. Mater. Chem. A* **2017**, 5 (21), 10561–10566.
- (2) Jiang, J.; Liu, Q.; Zeng, C.; Ai, L. Cobalt/Molybdenum Carbide@N-Doped Carbon as a Bifunctional Electrocatalyst for Hydrogen and Oxygen Evolution Reactions. *J. Mater. Chem. A* **2017**, 5 (32), 16929–16935.
- (3) Stern, L. A.; Feng, L.; Song, F.; Hu, X. Ni<sub>2</sub>P as a Janus Catalyst for Water Splitting: The Oxygen Evolution Activity of Ni<sub>2</sub>P Nanoparticles. *Energy Environ. Sci.* **2015**, 8 (8), 2347–2351.
- (4) Yan, L.; Jiang, H.; Xing, Y.; Wang, Y.; Liu, D.; Gu, X.; Dai, P.; Li, L.; Zhao, X. Nickel Metal-Organic Framework Implanted on Graphene and Incubated to Be Ultrasmall Nickel Phosphide Nanocrystals Acts as a Highly Efficient Water Splitting Electrocatalyst. *J. Mater. Chem. A* **2018**, 6 (4), 1682–1691.
- (5) Shi, H.; Liang, H.; Ming, F.; Wang, Z. Efficient Overall Water-Splitting Electrocatalysis Using Lepidocrocite VOOH Hollow Nanospheres. *Angew. Chemie - Int. Ed.* **2017**, 56 (2), 573–577.
- (6) Zhu, Y.; Zhou, W.; Zhong, Y.; Bu, Y.; Chen, X.; Zhong, Q.; Liu, M.; Shao, Z. A Perovskite Nanorod as Bifunctional Electrocatalyst for Overall Water Splitting. *Adv. Energy Mater.* **2017**, 7 (8), 1602122.
- (7) Yang, Y.; Zhang, K.; Lin, H.; Li, X.; Chan, H. C.; Yang, L.; Gao, Q. MoS<sub>2</sub>-Ni<sub>3</sub>S<sub>2</sub> Heteronanorods as Efficient and Stable Bifunctional Electrocatalysts for Overall Water

- Splitting. *ACS Catal.* **2017**, 7 (4), 2357–2366.
- (8) Gu, Y.; Chen, S.; Ren, J.; Jia, Y. A.; Chen, C.; Komarneni, S.; Yang, D.; Yao, X. Electronic Structure Tuning in Ni<sub>3</sub>FeN/r-GO Aerogel toward Bifunctional Electrocatalyst for Overall Water Splitting. *ACS Nano* **2018**, 12 (1), 245–253.
  - (9) Ahn, S. H.; Manthiram, A. Direct Growth of Ternary Ni-Fe-P Porous Nanorods onto Nickel Foam as a Highly Active, Robust Bi-Functional Electrocatalyst for Overall Water Splitting. *J. Mater. Chem. A* **2017**, 5 (6), 2496–2503.
  - (10) Chakrabarty, S.; Mukherjee, A.; Basu, S. RGO-MoS<sub>2</sub>Supported NiCo<sub>2</sub>O<sub>4</sub> Catalyst toward Solar Water Splitting and Dye Degradation. *ACS Sustain. Chem. Eng.* **2018**, 6 (4), 5238–5247.
  - (11) Guo, Y.; Tang, J.; Qian, H.; Wang, Z.; Yamauchi, Y. One-Pot Synthesis of Zeolitic Imidazolate Framework 67-Derived Hollow Co<sub>3</sub>S<sub>4</sub>@MoS<sub>2</sub> Heterostructures as Efficient Bifunctional Catalysts. *Chem. Mater.* **2017**, 29 (13), 5566–5573.
  - (12) Hu, E.; Feng, Y.; Nai, J.; Zhao, D.; Hu, Y.; Lou, X. W. Construction of Hierarchical Ni-Co-P Hollow Nanobricks with Oriented Nanosheets for Efficient Overall Water Splitting. *Energy Environ. Sci.* **2018**, 11 (4), 872–880.
  - (13) Cheng, Y.; Pang, K.; Wu, X.; Zhang, Z.; Xu, X.; Ren, J.; Huang, W.; Song, R. In Situ Hydrothermal Synthesis MoS<sub>2</sub>/Guar Gum Carbon Nanoflowers as Advanced Electrocatalysts for Electrocatalytic Hydrogen Evolution. *ACS Sustain. Chem. Eng.* **2018**, 6 (7), 8688–8696.
  - (14) Han, X.; Tong, X.; Liu, X.; Chen, A.; Wen, X.; Yang, N.; Guo, X.-Y. Hydrogen Evolution Reaction on Hybrid Catalysts of Vertical MoS<sub>2</sub> Nanosheets and Hydrogenated Graphene. *ACS Catal.* **2018**, acscatal.7b03316.

- (15) Xiong, X.; Ji, Y.; Xie, M.; You, C.; Yang, L.; Liu, Z.; Asiri, A. M.; Sun, X. MnO<sub>2</sub>-CoP<sub>3</sub>nanowires Array: An Efficient Electrocatalyst for Alkaline Oxygen Evolution Reaction with Enhanced Activity. *Electrochem. commun.* **2018**, *86* (November 2017), 161–165.
- (16) Guo, Y.; Gan, L.; Shang, C.; Wang, E.; Wang, J. A Cake-Style CoS<sub>2</sub>@MoS<sub>2</sub>/RGO Hybrid Catalyst for Efficient Hydrogen Evolution. *Adv. Funct. Mater.* **2017**, *27* (5), 1–7.
